# Supplementary material
Source: publisher figshare collection journal article supplement (https://sage.figshare.com/ndownloader/files/30778874)
Supplement: Supplementary file [file 30778874]

## Supplemental file 1: MEDLINE search strategies

The table below shows the full search strategy including the additional manipulation of the term 'mortality' conducted in February 2020. The original search strategy is in rows 1-26; the additional strategy is from row 27 onwards.

| #  | Searches                                                                                                                                                                                                                                                                                                                     | Results |
|----|------------------------------------------------------------------------------------------------------------------------------------------------------------------------------------------------------------------------------------------------------------------------------------------------------------------------------|---------|
| 1  | Frail elderly/                                                                                                                                                                                                                                                                                                               | 10985   |
| 2  | Frailty/                                                                                                                                                                                                                                                                                                                     | 2077    |
| 3  | frail*.ti,ab,kw.                                                                                                                                                                                                                                                                                                             | 20344   |
| 4  | 1 or 2 or 3                                                                                                                                                                                                                                                                                                                  | 24440   |
| 5  | Terminal Care/                                                                                                                                                                                                                                                                                                               | 27514   |
| 6  | Hospice Care/                                                                                                                                                                                                                                                                                                                | 6332    |
| 7  | Palliative Care/                                                                                                                                                                                                                                                                                                             | 52750   |
| 8  | Terminally Ill/                                                                                                                                                                                                                                                                                                              | 6419    |
| 9  | ("end of life" or end stage or late stage or deterioriat* or declin* or dying or palliat* or life limiting or life-limiting or terminal*).ti,ab,kw.                                                                                                                                                                          | 966012  |
| 10 | or/5-9                                                                                                                                                                                                                                                                                                                       | 994189  |
| 11 | (Stratification or Discrimination or Discriminate or c-statistic or "c statistic" or "Area under the curve" or AUC or Calibration or Indices or Algorithm or Multivariable).ti,ab,kw.                                                                                                                                        | 747655  |
| 12 | ROC Curve/                                                                                                                                                                                                                                                                                                                   | 55872   |
| 13 | "Predictive Value of Tests"/                                                                                                                                                                                                                                                                                                 | 198365  |
| 14 | observer variation/                                                                                                                                                                                                                                                                                                          | 41825   |
| 15 | (predict* or scor* or observ*).ti,ab,kw.                                                                                                                                                                                                                                                                                     | 5212233 |
| 16 | or/11-15                                                                                                                                                                                                                                                                                                                     | 5755012 |
| 17 | (adaptive clinical trial or clinical trial or clinical trial phase i or clinical trial phase ii or clinical trial phase iii or clinical trial phase iv or comparative study or controlled clinical trial or evaluation studies or meta analysis or multicenter study or observational study or pragmatic clinical trial).pt. | 2603782 |

|    |                                                                                                                                |         |
|----|--------------------------------------------------------------------------------------------------------------------------------|---------|
| 18 | exp epidemiologic studies/ or feasibility studies/ or pilot studies/                                                           | 2565475 |
| 19 | ((intervention* or program* or strateg* or initiative* or project?) and (evaluat* or effect* or measur* or assess*)).ti,ab,kw. | 1595158 |
| 20 | or/17-19                                                                                                                       | 5642691 |
| 21 | 4 and 10 and 16                                                                                                                | 1429    |
| 22 | 4 and 10 and 20                                                                                                                | 1842    |
| 23 | 21 or 22                                                                                                                       | 2352    |
| 24 | exp neoplasms/                                                                                                                 | 3283100 |
| 25 | 23 not 24                                                                                                                      | 2158    |
| 26 | limit 25 to (english language and humans)                                                                                      | 1674    |
| 27 | mortality/ or hospital mortality/                                                                                              | 80862   |
| 28 | mo.fs.                                                                                                                         | 561375  |
| 29 | 27 or 28                                                                                                                       | 605629  |
| 30 | 4 and 29 and (16 or 20)                                                                                                        | 2103    |
| 31 | 30 not 24                                                                                                                      | 1736    |
| 32 | limit 31 to (english language and humans)                                                                                      | 1659    |
| 33 | 32 not 26                                                                                                                      | 1382    |
| 34 | 4 and 27 and (16 or 20)                                                                                                        | 702     |
| 35 | 34 not 24                                                                                                                      | 677     |
| 36 | limit 35 to (english language and humans)                                                                                      | 646     |
| 37 | 36 not 26                                                                                                                      | 545     |
| 38 | 4 and 28 and (16 or 20)                                                                                                        | 1671    |
| 39 | 38 not 24                                                                                                                      | 1312    |
| 40 | limit 39 to (english language and humans)                                                                                      | 1260    |
| 41 | 40 not 26                                                                                                                      | 1053    |
| 42 | 41 not 37                                                                                                                      | 837     |

|    |                                           |      |
|----|-------------------------------------------|------|
| 43 | from 42 keep 1-837                        | 837  |
| 44 | Frailty/mo [Mortality]                    | 191  |
| 45 | 44 and (16 or 20)                         | 180  |
| 46 | limit 45 to (english language and humans) | 178  |
| 47 | 46 not 24                                 | 164  |
| 48 | 47 not 26                                 | 142  |
| 49 | 37 not 48                                 | 518  |
| 50 | 41 not (48 or 37)                         | 722  |
| 51 | 33 or 48                                  | 1382 |

## Supplemental file 2: studies excluded at full-text review

| Study                       | Reason                 | Notes                                                                                            |
|-----------------------------|------------------------|--------------------------------------------------------------------------------------------------|
| Amblas-Novellas et al. 2016 | Wrong population       | Not already identified as frail                                                                  |
| Amella 2003                 | Wrong study design     | Not prognostic or intervention                                                                   |
| Armstrong et al. 2010       | Wrong publication type | Research letter                                                                                  |
| Arora et al. 2010           | Wrong population       | Not already identified as frail - 'vulnerable hospitalised elders'                               |
| Barclay et al. 2014         | Wrong population       | Not defined as frail                                                                             |
| Brown et al. 2016           | Wrong time span        | > one year                                                                                       |
| Buchman et al. 2009         | Wrong time span        | > one year                                                                                       |
| Butcher et al. 2019         | Wrong time span        | > one year                                                                                       |
| Cardona-Morrell et al. 2015 | Wrong study design     | Review paper                                                                                     |
| Cardona-Morrell et al. 2017 | Wrong study design     | Narrative 'state of play'                                                                        |
| Cardona et al. 2018         | Wrong population       | Not already identified as frail                                                                  |
| Carey et al. 2008           | Wrong population       | Not clear that the population are all frail; not clear that people with cancer are disaggregated |
| Cole et al. 2019            | Wrong population       | Not defined as frail                                                                             |
| Conroy et al. 2011          | Wrong intervention     | Not prognostic; interventions not specifically for end of life                                   |
| Covinsky et al. 2003        | Wrong population       | Not clear that the population are all frail; not clear that people with cancer are disaggregated |
| Curtin et al. 2019          | Wrong publication type | Conference abstract                                                                              |
| Deng 2017                   | Wrong publication type | Conference abstract                                                                              |
| Dent et al. 2016            | Wrong study design     | Review of frailty scales, not prognostic models                                                  |
| Ekerstad et al. 2017        | Wrong population       | Identified as frail but not as being in end of life phase                                        |
| Espinoza et al. 2012        | Wrong time span        | > one year                                                                                       |
| Evans et al. 2016           | Wrong publication type | Conference abstract                                                                              |
| Giannini et al. 2007        | Wrong intervention     | Not prognostic; interventions not specifically for end of life                                   |
| Glajchen et al. 2011        | Wrong population       | Cannot disaggregate cancer patients                                                              |
| Heppenstall et al. 2015     | Wrong population       | Long term care residence as proxy for frailty                                                    |
| Huang et al. 2007           | Wrong population       | Not defined as frail                                                                             |
| Huijberts et al. 2016       | Wrong population       | Long term care residence as proxy for frailty                                                    |
| Iwata et al. 2006           | Wrong population       | Not defined as frail                                                                             |
| Jakobsson et al. 2011       | Wrong population       | Long term care residence as proxy for frailty                                                    |

|                               |                        |                                                                                                  |
|-------------------------------|------------------------|--------------------------------------------------------------------------------------------------|
| Kaehr et al. 2016             | Wrong population       | Not already identified as frail                                                                  |
| Kagansky et al. 2005          | Wrong population       | Frailty as synonym for old age                                                                   |
| Kinley et al. 2014            | Wrong study design     | Implementation study                                                                             |
| Landi et al. 2007             | Wrong population       | Not clear that the population are frail                                                          |
| Lunney et al. 2003            | Wrong population       | Long term care residence as proxy for frailty                                                    |
| Ma et al. 2013                | Wrong population       | Not already identified as frail                                                                  |
| Mendonca et al. 2019          | Wrong time span        | > one year                                                                                       |
| Mukamel et al. 2004           | Wrong population       | Not clear that the population are all frail; not clear that people with cancer are disaggregated |
| Nouvenne et al. 2016          | Wrong intervention     | Biomarker study                                                                                  |
| O'Caoimh et al. 2014          | Wrong population       | Less than half the population clearly defined as frail                                           |
| Overbeek et al. 2016          | Wrong publication type | Conference abstract                                                                              |
| Overbeek et al. 2018          | Wrong intervention     | Participants not clearly identified as being at end of life                                      |
| Overbeek et al. 2019          | Wrong intervention     | Participants not clearly identified as being at end of life                                      |
| Romoren et al. 2003           | Wrong outcome          | Not predicting entry into end of life phase                                                      |
| Salamanca-Balen et al. 2018   | Wrong population       | Frailty as synonym for old age                                                                   |
| Sanchez-Rodriguez et al. 2019 | Wrong population       | Not clear that the population are frail                                                          |
| Stolz et al. 2019             | Wrong population       | Not identified as frail                                                                          |
| Stow et al. 2018              | Wrong population       | Not already identified as frail                                                                  |
| Sullivan et al. 1991          | Wrong population       | No access to article, but from 1991 which predates the conceptions of frailty in our criteria    |
| Thomazeau et al. 2017         | Wrong study design     | Review; article in French                                                                        |
| Todd et al. 2019              | Wrong time span        | > one year                                                                                       |
| van der Steen et al. 2005     | Wrong population       | Long term care residence as proxy for frailty                                                    |
| van Kempen et al. 2015        | Wrong outcome          | Not end of life                                                                                  |
| Vermeiren et al. 2016         | Wrong population       | Review; four papers of relevance but not identified as frail                                     |
| Woods et al. 2019             | Wrong publication type | Conference abstract                                                                              |
| Wu et al. 2018                | Wrong time span        | > one year                                                                                       |
| Yash Pal et al. 2017          | Wrong study design     | Descriptive                                                                                      |
| Zasadzka et al. 2019          | Wrong population       | Not already identified as frail                                                                  |
